# Supplementary material for: Polymyxin Stereochemistry and Its Role in Antibacterial Activity and Outer Membrane Disruption
Source: PubMed Central journal article supplement (PMC9745799; doi:10.1021/acsinfecdis.2c00307), 2022-11-07
Supplement: id2c00307_si_001.pdf [file id2c00307_si_001.pdf]

Supporting information for:

# Polymyxin Stereochemistry and its Role in Antibacterial Activity and Outer Membrane Disruption

Cornelis J. Slingerland<sup>1</sup>, Ioli Kotsogianni<sup>1</sup>, Charlotte M.J. Wesseling<sup>1</sup>, Nathaniel I. Martin<sup>1,\*</sup>

<sup>1</sup>Biological Chemistry Group, Institute of Biology Leiden, Leiden University, Sylviusweg 72, 2333 BE Leiden, The Netherlands. \*n.i.martin@biology.leidenuniv.nl

## Table of contents

|           |                                                          |
|-----------|----------------------------------------------------------|
| S1        | Abbreviations                                            |
| S2        | Reagents and General Procedures                          |
| S3-4      | HRMS and HPLC analyses                                   |
| S5-6      | NMR analyses                                             |
| S7        | HPLC/MS analysis of commercially obtained polymyxin B    |
| S8        | Information on used bacterial strains                    |
| S9        | Additional MIC analyses and values for FICI calculations |
| S10 – S13 | Isothermal calorimetry data                              |

## Abbreviations:

<sup>t</sup>BuOH: tert-butanol; BOP: (benzotriazole-1-yloxy)tris-(dimethylamino)phosphonium hexafluorophosphate; CTC: 2-chloro tritylchloride; Dab: 2,4-Diaminobutyric acid; DIPEA: *N,N*-diisopropylethylamine; DIPA: *N,N*-di-isopropyl amine; DIC: *N,N'*-Diisopropylcarbodiimide; FICI: fractional inhibitory concentration index; mcr: mobile colistin resistance; OM: outer membrane; Oxyma pure: Ethyl cyano(hydroxyimino)acetate; PMBN: polymyxin B nonapeptide; PmxB: Polymyxin B; TIPS: tri-isopropyl silane.

## **Reagents and General Procedures**

### **General Procedures**

All reagents employed were of American Chemical Society (ACS) grade or finer and were used without further purification unless otherwise stated. Polymyxin B sulphate was obtained as a mixture of isomers (Combi-Blocks, San Diego, USA). An HPLC trace of the mixture, including identification of the main species is shown in Figure S7. For compound characterization HRMS analysis was performed on a Shimadzu Nexera X2 UHPLC system with a Waters Acquity HSS C18 column (2.1 × 100 mm, 1.8 μm) at 30 °C and equipped with a diode array detector. The following solvent system, at a flow rate of 0.5 mL/min, was used: solvent A, 0.1 % formic acid in water; solvent B, 0.1 % formic acid in acetonitrile. Gradient elution was as follows: 95:5 (A/B) for 1 min, 95:5 to 15:85 (A/B) over 6 min, 15:85 to 0:100 (A/B) over 1 min, 0:100 (A/B) for 3 min, then reversion back to 95:5 (A/B) for 3 min. This system was connected to a Shimadzu 9030 QTOF mass spectrometer (ESI ionisation) calibrated internally with Agilent's API-TOF reference mass solution kit (5.0 mM purine, 100.0 mM ammonium trifluoroacetate and 2.5 mM hexakis(1H,1H,3H-tetrafluoropropoxy)phosphazine) diluted to achieve a mass count of 10000.

Purity of the peptides was confirmed to be ≥ 95% by analytical RP-HPLC using a Shimadzu Prominence-i LC-2030 system with a Dr. Maisch Reprosil Gold 120 C18 column (4.6 × 250 mm, 5 μm) at 30 °C and equipped with a UV detector monitoring at 214 nm. The following solvent system, at a flow rate of 1 mL/min, was used: solvent A, 0.1 % TFA in water/acetonitrile, 95/5; solvent B, 0.1 % TFA in water/acetonitrile, 5/95. Gradient elution was as follows: 100:0 (A/B) for 3 min, 100:0 to 0:100 (A/B) over 47 min, 0:100 (A/B) for 4 min, then reversion back to 100:0 (A/B) over 1 min, 100:0 (A/B) for 5 min.

The compounds were purified via preparative HPLC using a BESTA-Technik system with a Dr. Maisch Reprosil Gold 120 C18 column (25 × 250 mm, 10 μm) and equipped with a ECOM Flash UV detector monitoring at 214 nm. The following solvent system, at a flow rate of 12 mL/min, was used: solvent A, 0.1 % TFA in water/acetonitrile 95/5; solvent B, 0.1 % TFA in water/acetonitrile 5/95. Gradient elution was as follows: for PMBN and *ent*-PMBN: 100:0 (A:B) for 3 min, 100:0 to 90:10 (A:B) over 3 min, 90:10 to 60:40 (A:B) over 41 min, 60:40 to 0:100 (A:B) over 1 min, 0:100 (A:B) for 4 min, then reversion back to 100:0 (A:B) over 1 min, 100:0 (A:B) for 2 min.

For PmxB4 and ent-Pmx4: 100:0 (A:B) for 3 min, 100:0 to 85:15 (A/B) over 4 min, 85:15 to 55:45 (A:B) over 41 min, 55:45 to 0:100 (A:B) over 1 min, 0:100 (A:B) for 4 min, then reversion back to 100:0 (A:B) over 1 min, 100:0 (A:B) for 2 min.

### HRMS analysis

**Table S1.** HRMS data for polymyxin analogues

| Compound  | Composition                                                     | Calculated mass | [M+H] <sup>+</sup> | [M+2H]/2 | Found mass |
|-----------|-----------------------------------------------------------------|-----------------|--------------------|----------|------------|
| PmxB4     | C <sub>54</sub> H <sub>94</sub> N <sub>16</sub> O <sub>13</sub> | 1174.7186       | 1175.7266          | 588.3673 | 588.3675   |
| ent-PmxB4 | C <sub>54</sub> H <sub>94</sub> N <sub>16</sub> O <sub>13</sub> | 1174.7186       | 1175.7266          | 588.3673 | 588.3674   |
| PMBN      | C <sub>43</sub> H <sub>74</sub> N <sub>14</sub> O <sub>11</sub> | 962.5661        | 963.5741           | 482.2911 | 482.2909   |
| ent-PMBN  | C <sub>43</sub> H <sub>74</sub> N <sub>14</sub> O <sub>11</sub> | 962.5661        | 963.5741           | 482.2911 | 482.2907   |

### HPLC analysis

#### PmxB4

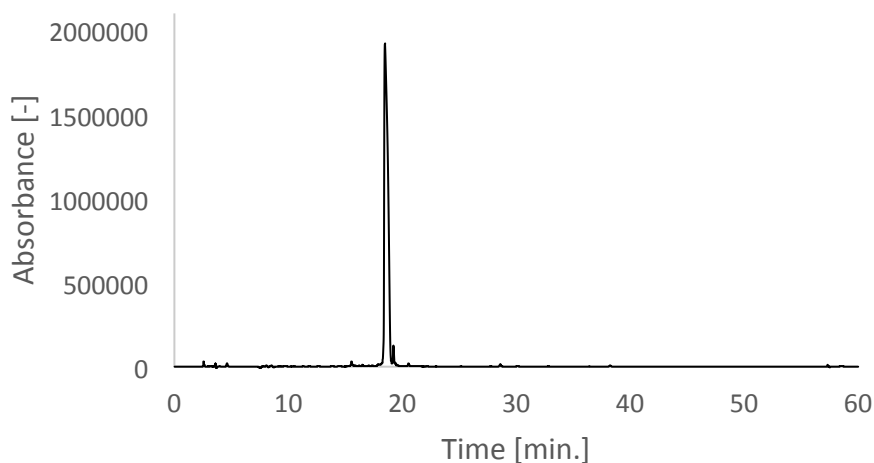

#### ent-PmxB4

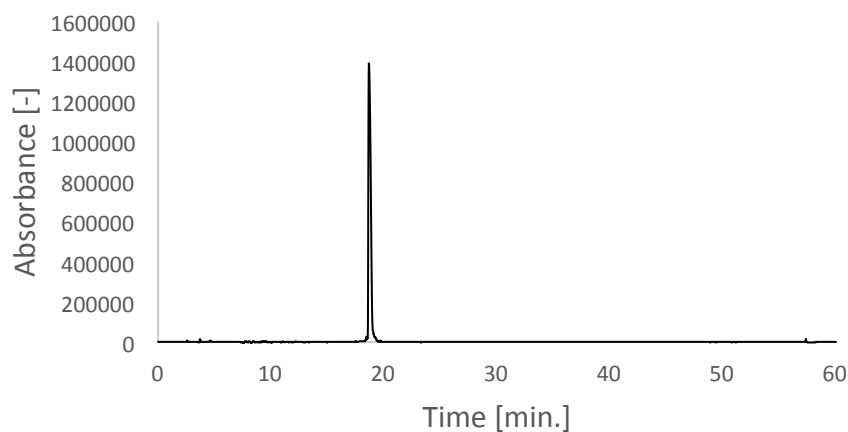

**Figure S1A.** Analytical HPLC traces for enantiomers PmxB4 and ent-PmxB4.

**PMBN**

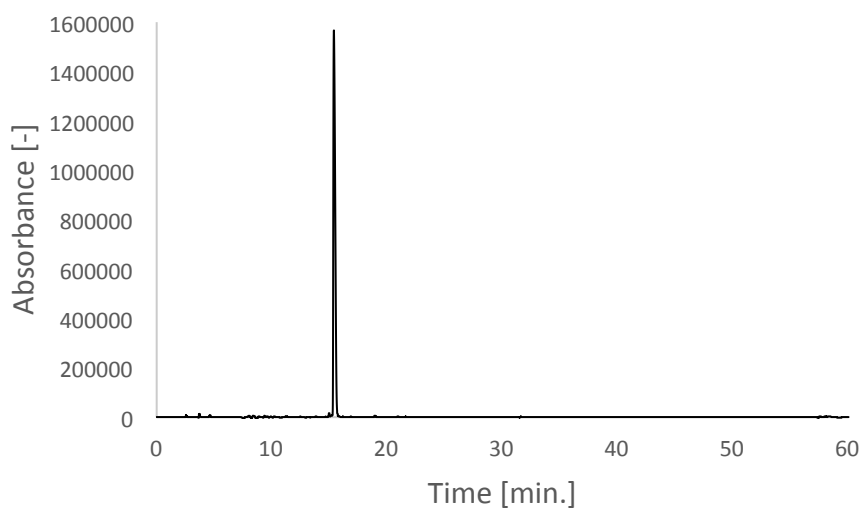

**ent-PMBN**

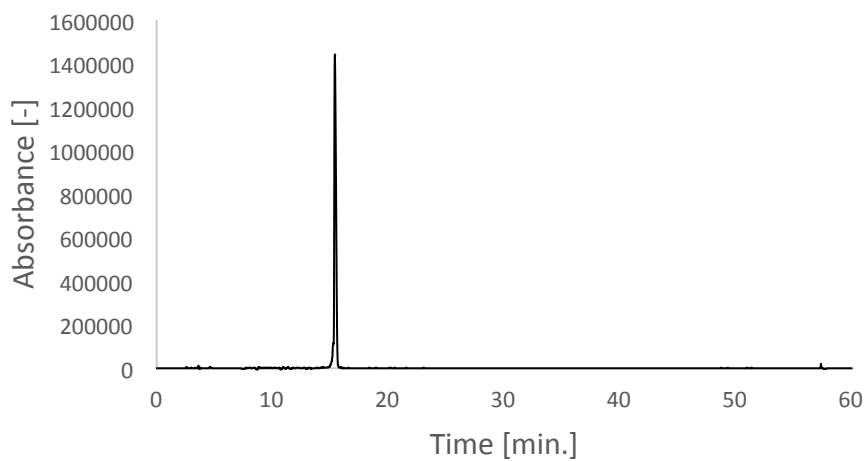

**Figure S1B.** Analytical HPLC traces for enantiomers PMBN and *ent*-PMBN

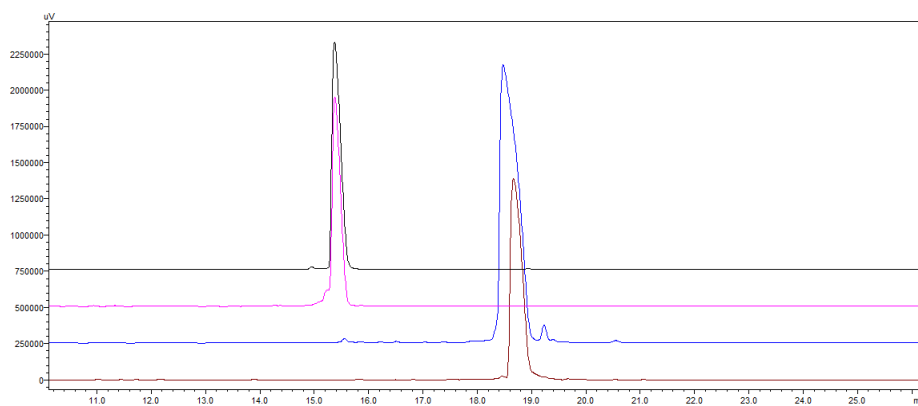

**Figure S2.** Overlay of analytical HPLC traces of PmxB4 (blue), *ent*-PmxB4 (brown), PMBN (black) and *ent*-PMBN (purple) indicating enantiomerism between PmxB4/*ent*-PmxB4 and PMBN/*ent*-PMBN.

### NMR analysis

PmxB4, *ent*-PmxB4, PMBN and *ent*-PMBN were analyzed by both 1D and 2D NMR. Samples were dissolved in 90% H<sub>2</sub>O, 10% D<sub>2</sub>O, with the addition of TFA to a final concentration of 0.1%. NMR spectra were recorded at 850 MHz, at ambient temperature. Watergate water suppression was used. Samples of PmxB4 and *ent*-PmxB4 were compared to PmxB1, as isolated from a commercially available polymyxin mixture.

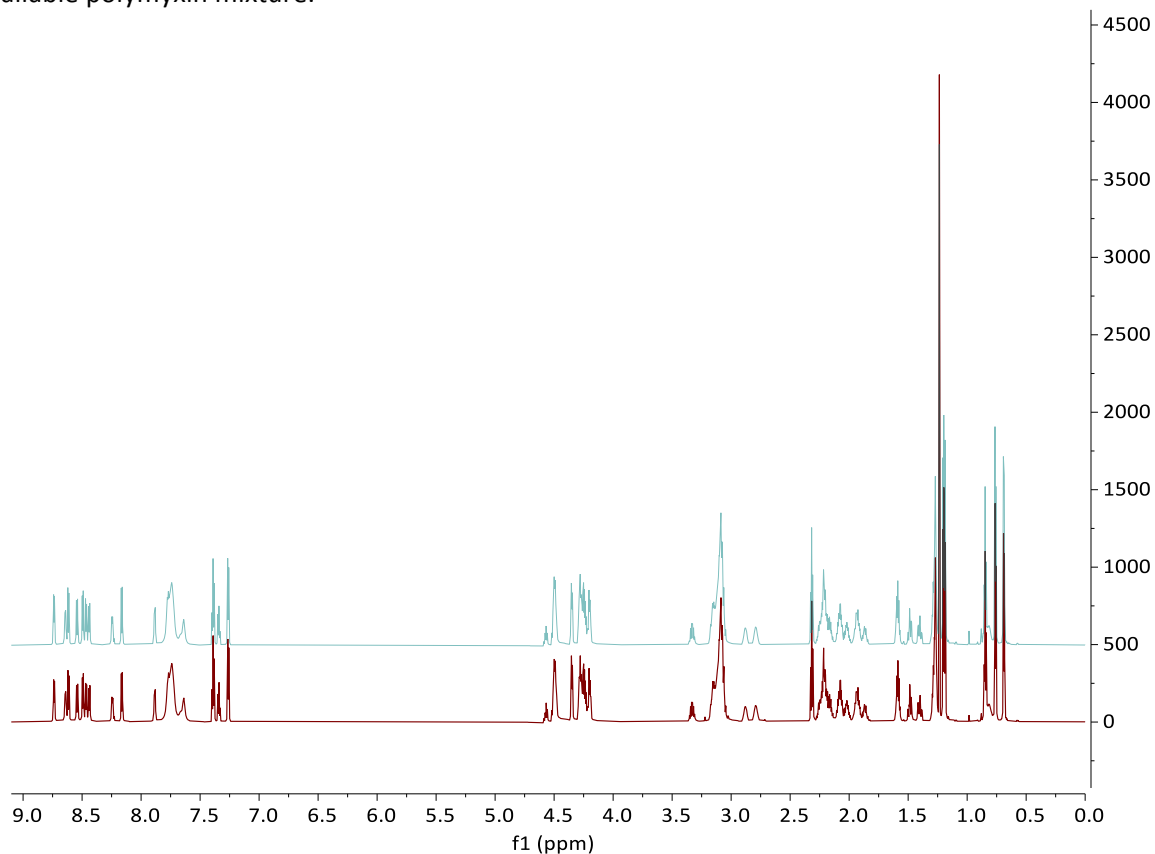

**Figure S3.** <sup>1</sup>H NMR comparison between *ent*-PmxB4 (top, blue) and PmxB4 (bottom, red) showing identity between the two samples.

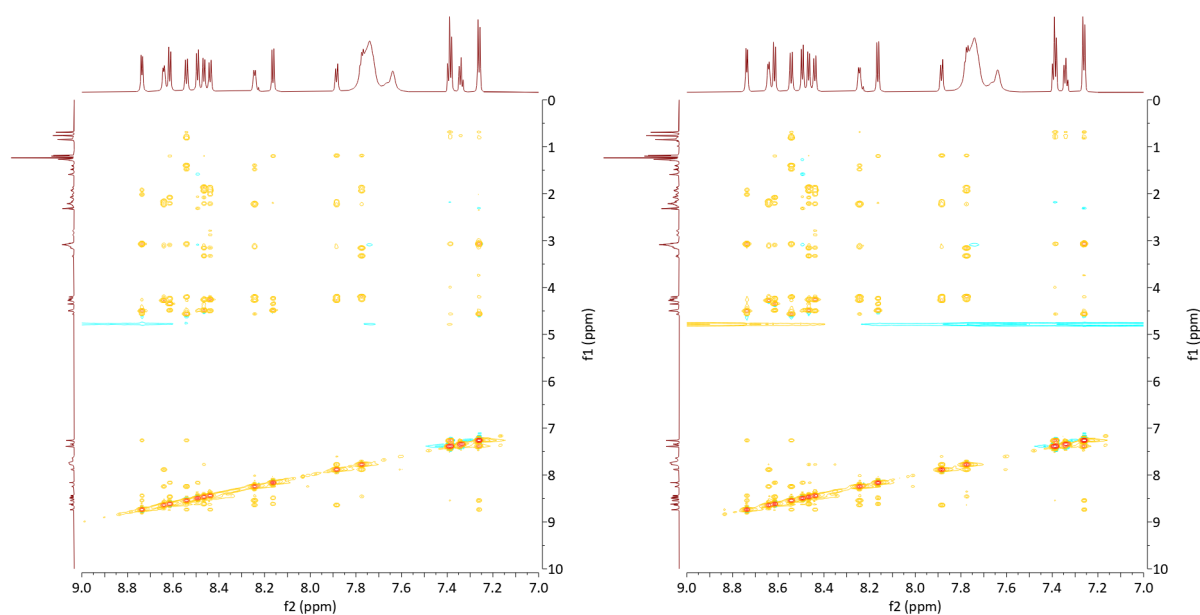

**Figure S4.** NOESY comparison between *ent*-PmxB4 (left) and PmxB4 (right) showing identity between the two samples.

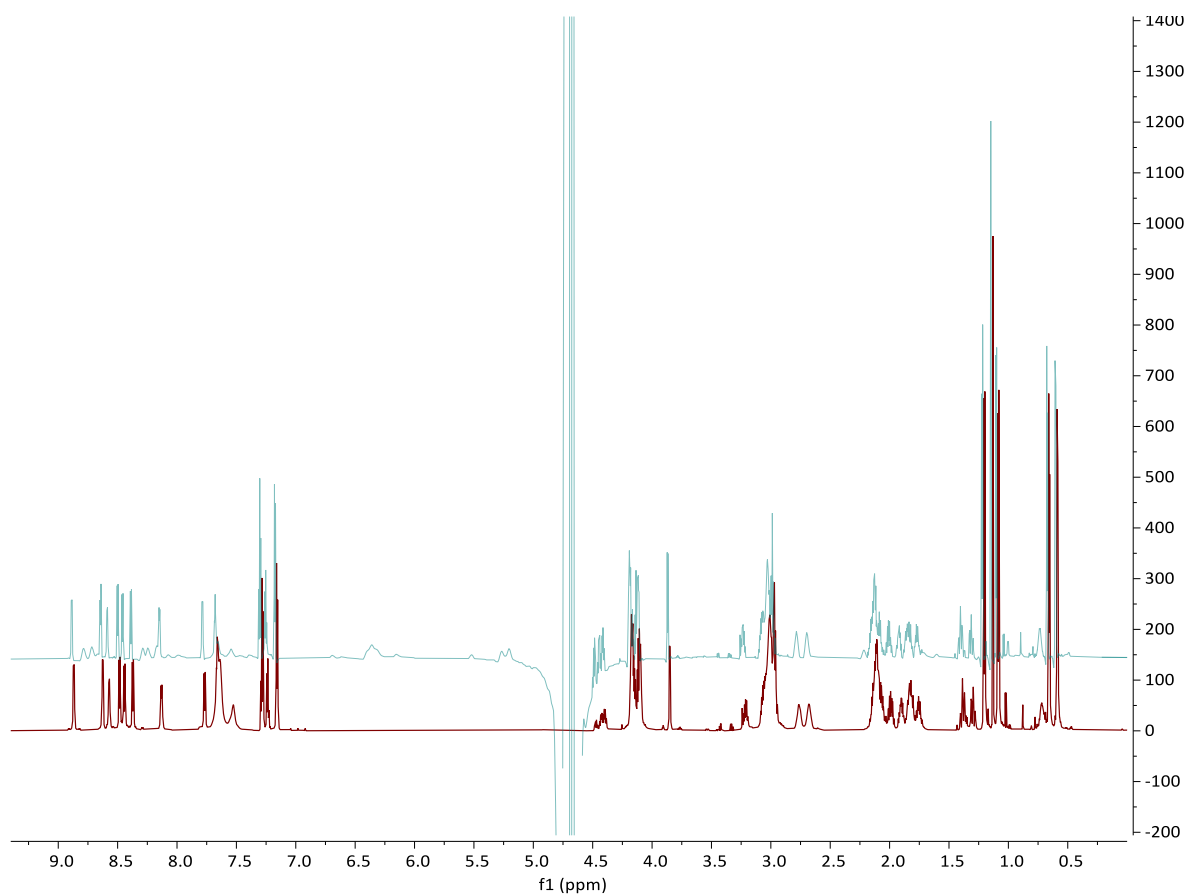

**Figure S5.**  $^1\text{H}$  NMR comparison between *ent*-PMBN (top, blue) and PMBN (bottom, red) showing identity between the two samples.

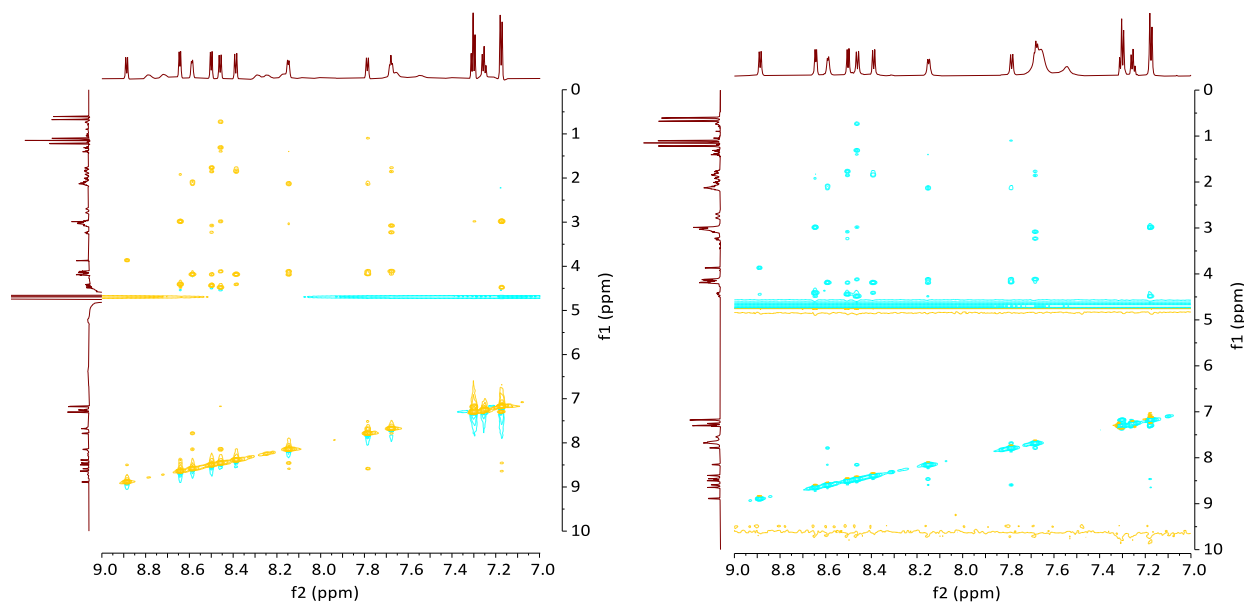

**Figure S6.** NOESY comparison between *ent*-PmxB4 (left) and PmxB4 (right) showing identity between the two samples.

## HPLC/MS analysis on polymyxin B from commercial source

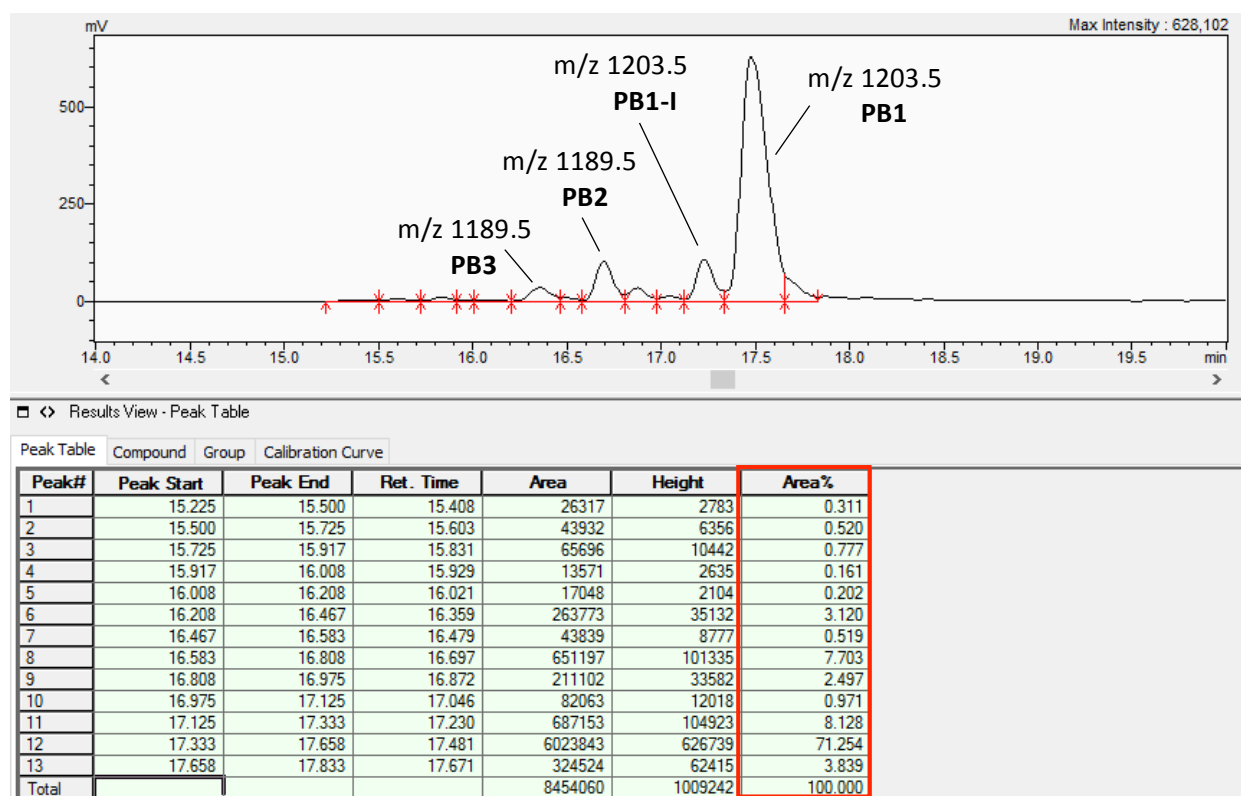

**Figure S7.** Analysis of the commercially obtained Polymyxin B, typically supplied as mixture of isomers. Observed m/z values for main polymyxin B species are indicated in the chromatogram. PB: polymyxin B; PB1-I: polymyxin B<sub>1</sub> with isoleucine at position 7.

## Bacterial strains

**Table S2.** Information on strain identity and origin.

| Strain               | Strain designator       | Resistance | Source                                                                                                                                                                                   |
|----------------------|-------------------------|------------|------------------------------------------------------------------------------------------------------------------------------------------------------------------------------------------|
| <i>E. coli</i>       | ATCC 25922              |            | ATCC collection                                                                                                                                                                          |
|                      | BW25113                 |            | Utrecht University Medical Center (UMC) – Microbiology Department. Heidelberglaan 100, 3584 CX Utrecht, The Netherlands                                                                  |
|                      | mcr-1                   | mcr-1      | Clinical isolate, Utrecht University Medical Center (UMC) – Microbiology Department. Heidelberglaan 100, 3584 CX Utrecht, The Netherlands                                                |
|                      | JW3594 ( $\Delta$ waaD) |            | E. Coli BW25113 $\Delta$ rfaD. Keio knock-out collection                                                                                                                                 |
|                      | JW3596 ( $\Delta$ waaC) |            | E. Coli BW25113 $\Delta$ rfaC. Keio knock-out collection                                                                                                                                 |
| <i>K. pneumoniae</i> | ATCC 13883              |            | ATCC collection                                                                                                                                                                          |
| <i>A. baumannii</i>  | ATCC 19606              |            | ATCC collection                                                                                                                                                                          |
| <i>P. aeruginosa</i> | ATCC 27853              |            | ATCC collection                                                                                                                                                                          |
|                      | NRZ03961                | IMP-1      | National reference laboratory for multidrug-resistant gram-negative bacteria, department for medical microbiology, Ruhr-University Bochum, Universitaetsstr. 150, 44801 Bochum, Germany. |
|                      | ATCC 10145              |            | ATCC collection                                                                                                                                                                          |
|                      | 2018-007                | IMP-7      | The Dutch national institute for public health and the environment (RIVM), Antonie van Leeuwenhoeklaan 9, 3721 MA Bilthoven, The Netherlands                                             |



### MICs in presence of PMBN/SPR741

**Table S3.** MIC values for *ent*-PmxB4, in presence of either PMBN or SPR741.

|                      |                   | + PMBN (8 ug/mL) | + SPR741 (8 ug/mL) |
|----------------------|-------------------|------------------|--------------------|
| <i>E. coli</i>       | <b>ATCC 25922</b> | 128              | 128                |
| <i>K. pneumoniae</i> | <b>ATCC 13883</b> | >128             | >128               |
| <i>A. baumannii</i>  | <b>ATCC 19606</b> | >128             | >128               |
| <i>P. aeruginosa</i> | <b>ATCC 10145</b> | >128             | >128               |

### FICI values

**Table S4.** MIC values of rifampicin, PmxB4, *ent*-PmxB4, PMBN and *ent*-PMBN, used for calculation of FICI values shown in Figure 2.

|                                          |            | MIC alone<br>(µg/mL) | MIC in<br>combination<br>(µg/mL) |                   | MIC alone<br>(µg/mL) | MIC in<br>combination<br>(µg/mL) | FICI   |
|------------------------------------------|------------|----------------------|----------------------------------|-------------------|----------------------|----------------------------------|--------|
| <b><i>E. coli</i><br/>ATCC<br/>25922</b> | Rifampicin | 8                    | 0.5                              | PmxB4             | 1                    | 1                                | > 0.5  |
|                                          | Rifampicin | 8                    | 0.1                              | <i>ent</i> -PmxB4 | 128                  | 8                                | 0.08   |
|                                          | Rifampicin | 8                    | 0.1                              | PMBN              | ≥256                 | 2                                | ≤ 0.02 |
|                                          | Rifampicin | 8                    | 2                                | <i>ent</i> -PMBN  | ≥256                 | 32                               | ≤ 0.38 |
| <b><i>E. coli</i><br/>mcr-1</b>          | Rifampicin | 8                    | 0.3                              | PmxB4             | 8                    | 1                                | 0.16   |
|                                          | Rifampicin | 8                    | 1                                | <i>ent</i> -PmxB4 | 128                  | 8                                | 0.19   |
|                                          | Rifampicin | 8                    | 1                                | PMBN              | ≥256                 | 4                                | ≤ 0.14 |
|                                          | Rifampicin | 8                    | 2                                | <i>ent</i> -PMBN  | ≥256                 | 32                               | ≤ 0.38 |

## Isothermal calorimetry (ITC) data

### Control titrations

#### 1. Buffer into LPS

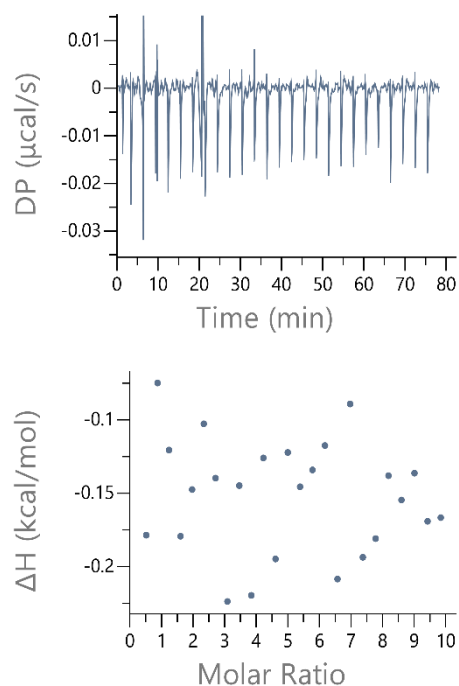

**Figure S8.** Control titration into LPS. Buffer was titrated into LPS (20  $\mu\text{M}$ , from *E. Coli* O55:B5).

### Control titrations

#### 2. Lipopeptides into buffer

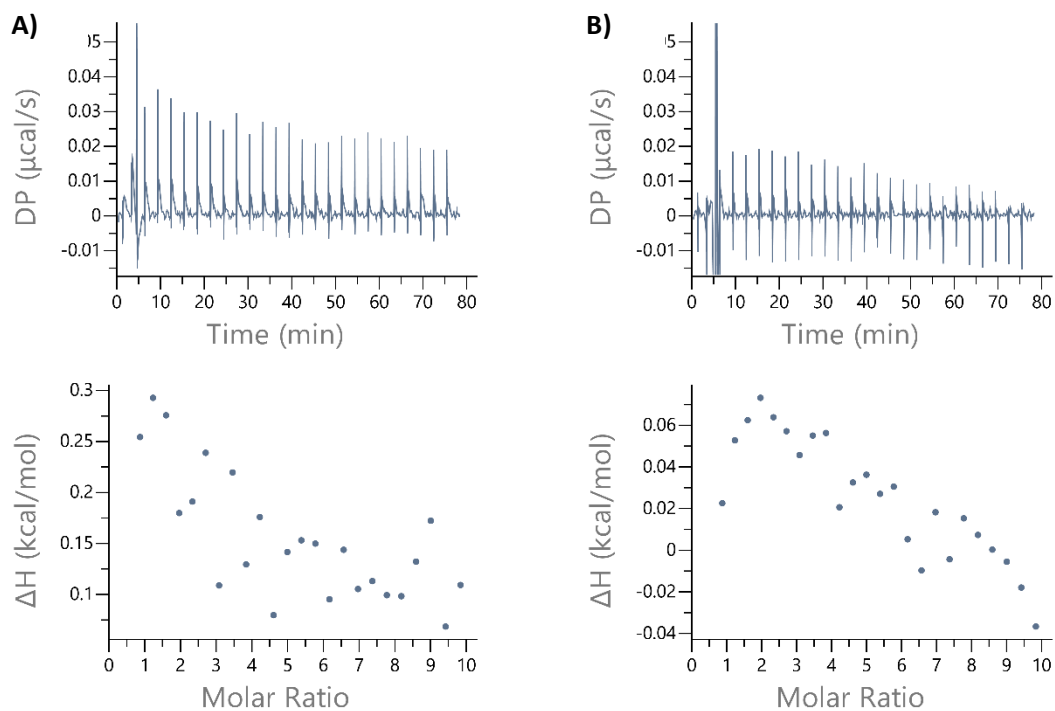

**Figure S9.** Control titrations into buffer. **A)** PmxB4 (1 mM) was titrated into buffer. **B)** *ent*-PmxB4 (1 mM) was titrated into buffer.

## Control titrations

### 3. Nonapeptides into buffer

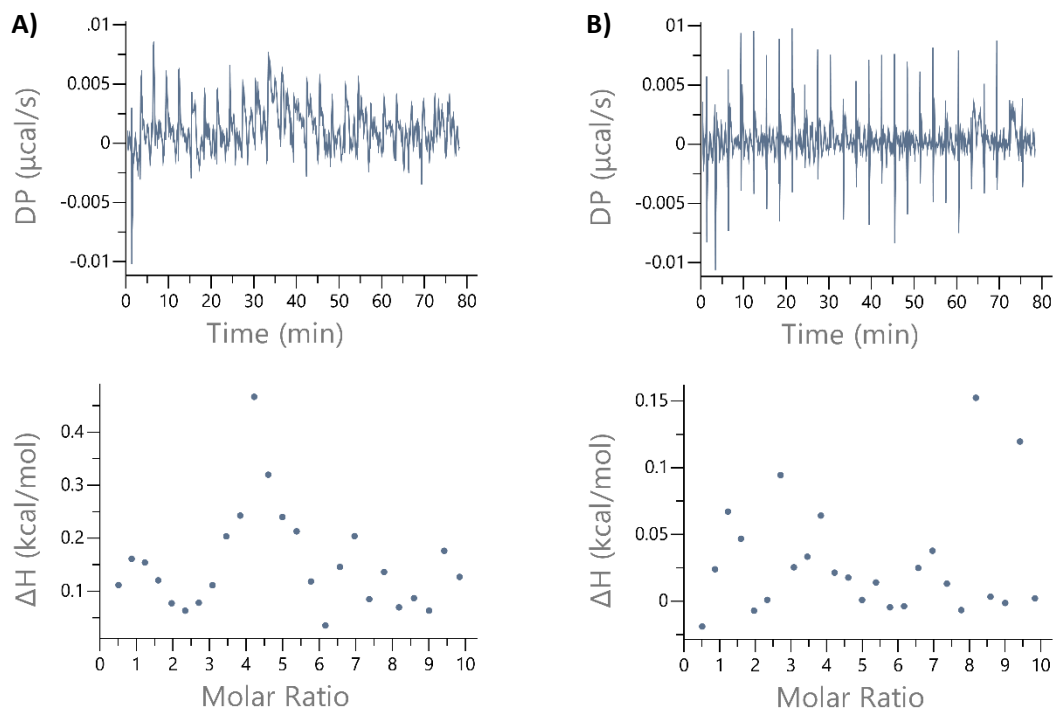

**Figure S10.** Control titrations into buffer. **A)** PMBN (1 mM) was titrated into buffer. **B)** ent-PMBN (1 mM) was titrated into buffer.

## Titration of compounds into LPS (triplicates).

### 1. Titration of PmxB4 (1 mM) into LPS (20 µM).

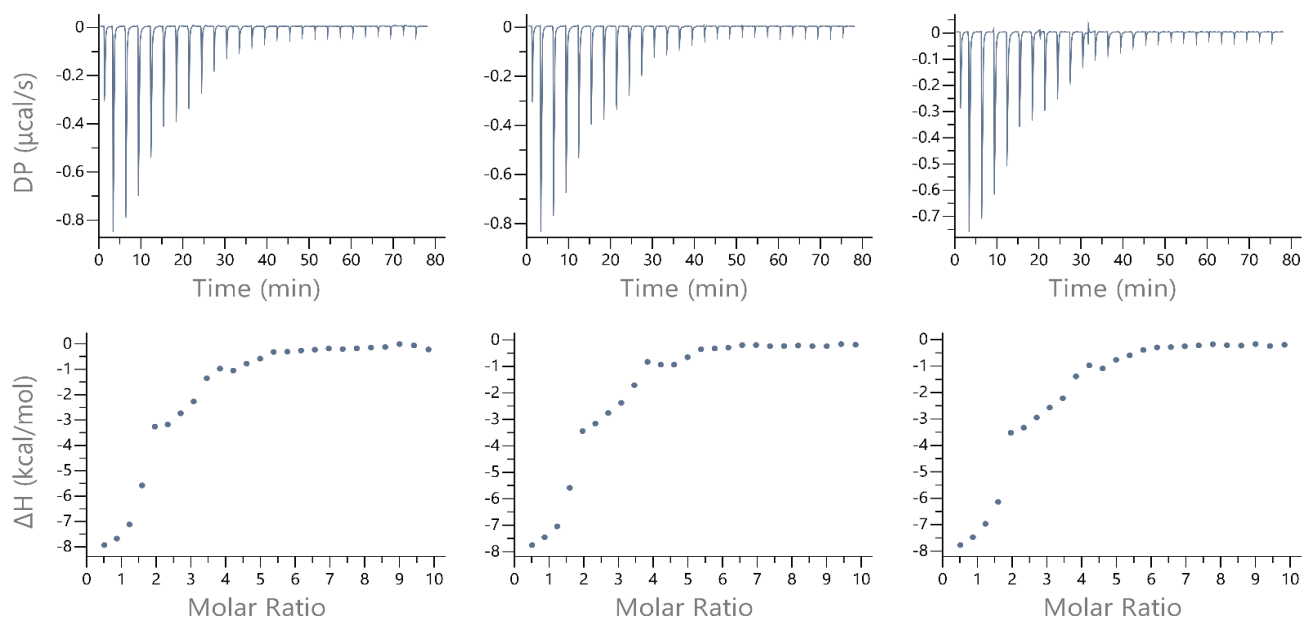

**Figure S11.** Triplicate experiment of titration of PmxB4 into LPS (20 µM).

**Titration of compounds into LPS (triplicates).**

**2. Titration of *ent*-PmxB4 (1 mM) into LPS (20  $\mu$ M).**

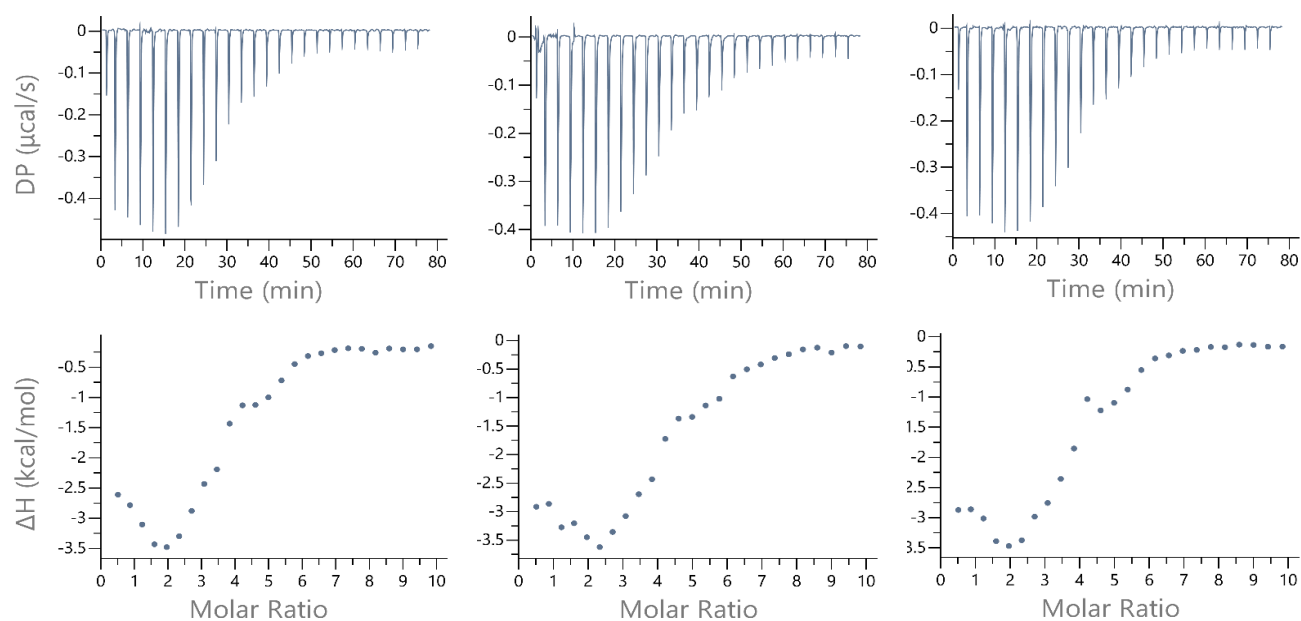

**Figure S12.** Triplicate experiment of titration of *ent*-PmxB4 into LPS (20  $\mu$ M).

**Titration of compounds into LPS (triplicates).**

**3. Titration of PMBN (1 mM) into LPS (20  $\mu$ M).**

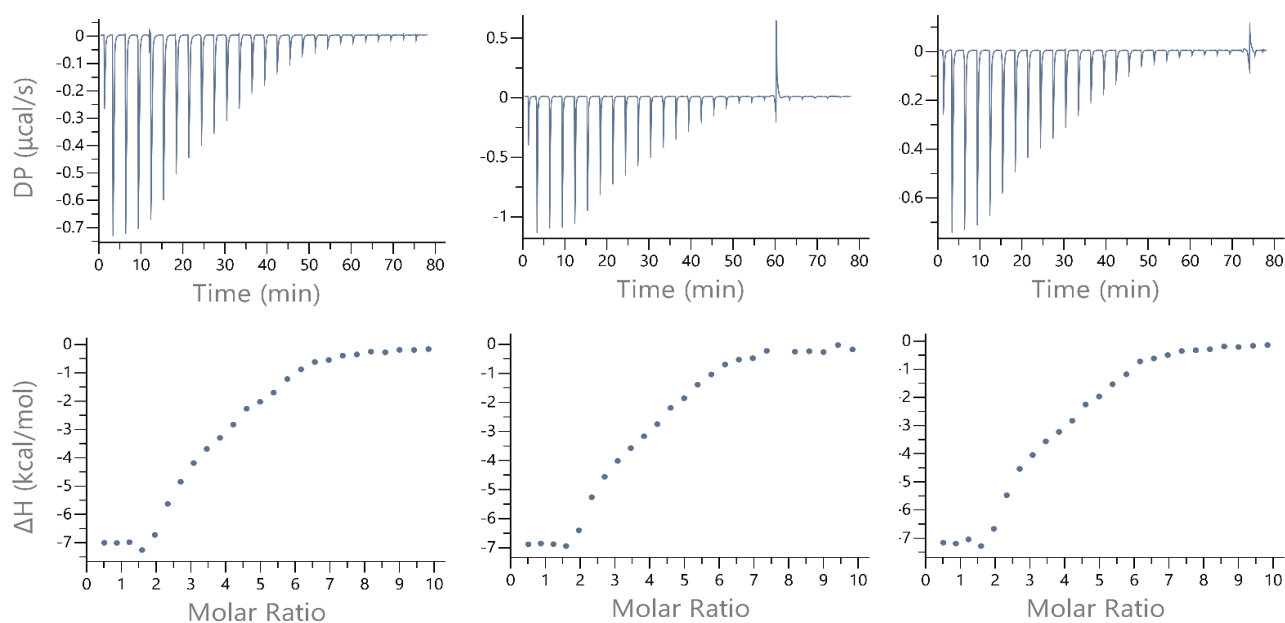

**Figure S13.** Triplicate experiment of titration of PMBN into LPS (20  $\mu$ M).

**Titration of compounds into LPS (triplicates).**

**4. Titration of *ent*-PMBN (1 mM) into LPS (20  $\mu$ M).**

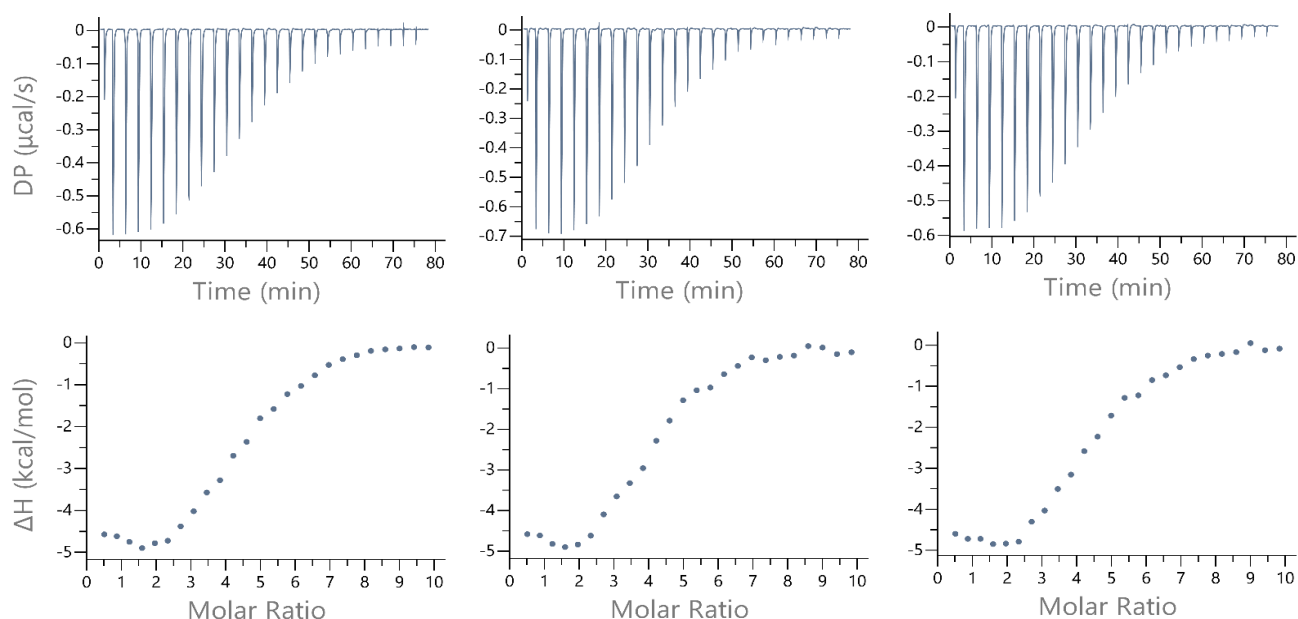

**Figure S14.** Triplicate experiment of titration of *ent*-PMBN into LPS (20  $\mu$ M).

**Table S5.** Thermodynamic analysis from the titration of compounds (1 mM) in LPS (20 $\mu$ M) at 37 $^{\circ}$ C. Mean values and standard deviation from three experiments are shown.

|                       | $\Delta\Delta H^a$<br>(kcal/mol) | Fitting<br>Model | Fitted Parameters for Single Site binding |                          |                  |                          |
|-----------------------|----------------------------------|------------------|-------------------------------------------|--------------------------|------------------|--------------------------|
|                       |                                  |                  | $\Delta H$<br>(kcal/mol)                  | $\Delta G$<br>(kcal/mol) | $K_D$ ( $\mu$ M) | Peptide/LPS <sup>b</sup> |
| PmxB4                 | $-7.86 \pm 0.10$                 | ND <sup>c</sup>  | ND                                        | ND                       | ND               | ND                       |
| <i>ent</i> -<br>PmxB4 | $-3.485 \pm 0.015$               | ND <sup>c</sup>  | ND                                        | ND                       | ND               | ND                       |
| PMBN                  | $-7.20 \pm 0.19$                 | One-site         | $-8.4 \pm 0.25$                           | $-7.24 \pm 0.03$         | $8.0 \pm 0.4$    | 3.5                      |
| <i>ent</i> -<br>PMBN  | $-4.91 \pm 0.03$                 | One-site         | $-5.2 \pm 0.03$                           | $-7.69 \pm 0.06$         | $3.9 \pm 0.4$    | 4.3                      |

<sup>a</sup> Maximum enthalpy observed after subtraction of dilution control. Global analysis. <sup>b</sup> Molar ratio of peptide to LPS preparation assuming 20 kDa molecular weight. <sup>c</sup> ND: Not determined. No model was able to fit the global titration curve. Attempts included fitting in the following binding models: one set of sites, two set of sites, sequential binding sites with 2,3 and 4 sites.
